# Supplementary material for: Small Island Developing States under threat by rising seas even in a 1.5 °C warming world
Source: Springer Nature journal article supplement (doi:10.1038/s41893-023-01230-5), 2023-10-09
Supplement: 41893_2023_1230_MOESM1_ESM.pdf [file 41893_2023_1230_MOESM1_ESM.pdf]

## Reporting Summary

Nature Portfolio wishes to improve the reproducibility of the work that we publish. This form provides structure for consistency and transparency in reporting. For further information on Nature Portfolio policies, see our [Editorial Policies](#) and the [Editorial Policy Checklist](#).

### Statistics

For all statistical analyses, confirm that the following items are present in the figure legend, table legend, main text, or Methods section.

n/a Confirmed

- The exact sample size ( $n$ ) for each experimental group/condition, given as a discrete number and unit of measurement
- A statement on whether measurements were taken from distinct samples or whether the same sample was measured repeatedly
- The statistical test(s) used AND whether they are one- or two-sided  
*Only common tests should be described solely by name; describe more complex techniques in the Methods section.*
- A description of all covariates tested
- A description of any assumptions or corrections, such as tests of normality and adjustment for multiple comparisons
- A full description of the statistical parameters including central tendency (e.g. means) or other basic estimates (e.g. regression coefficient) AND variation (e.g. standard deviation) or associated estimates of uncertainty (e.g. confidence intervals)
- For null hypothesis testing, the test statistic (e.g.  $F$ ,  $t$ ,  $r$ ) with confidence intervals, effect sizes, degrees of freedom and  $P$  value noted  
*Give  $P$  values as exact values whenever suitable.*
- For Bayesian analysis, information on the choice of priors and Markov chain Monte Carlo settings
- For hierarchical and complex designs, identification of the appropriate level for tests and full reporting of outcomes
- Estimates of effect sizes (e.g. Cohen's  $d$ , Pearson's  $r$ ), indicating how they were calculated

*Our web collection on [statistics for biologists](#) contains articles on many of the points above.*

### Software and code

Policy information about [availability of computer code](#)

Data collection

Data analysis

For manuscripts utilizing custom algorithms or software that are central to the research but not yet described in published literature, software must be made available to editors and reviewers. We strongly encourage code deposition in a community repository (e.g. GitHub). See the Nature Portfolio [guidelines for submitting code & software](#) for further information.

### Data

Policy information about [availability of data](#)

All manuscripts must include a [data availability statement](#). This statement should provide the following information, where applicable:

- Accession codes, unique identifiers, or web links for publicly available datasets
- A description of any restrictions on data availability
- For clinical datasets or third party data, please ensure that the statement adheres to our [policy](#)

All data used are public and sources are provided in the manuscript. The final dataset produced is available through the LISCoAsT repository of the JRC data collection (<http://data.jrc.ec.europa.eu/collection/LISCOAST>)

## Research involving human participants, their data, or biological material

Policy information about studies with [human participants or human data](#). See also policy information about [sex, gender \(identity/presentation\), and sexual orientation](#) and [race, ethnicity and racism](#).

|                                                                    |              |
|--------------------------------------------------------------------|--------------|
| Reporting on sex and gender                                        | Not relevant |
| Reporting on race, ethnicity, or other socially relevant groupings | Not relevant |
| Population characteristics                                         | Not relevant |
| Recruitment                                                        | Not relevant |
| Ethics oversight                                                   | Not relevant |

Note that full information on the approval of the study protocol must also be provided in the manuscript.

## Field-specific reporting

Please select the one below that is the best fit for your research. If you are not sure, read the appropriate sections before making your selection.

Life sciences     Behavioural & social sciences     Ecological, evolutionary & environmental sciences

For a reference copy of the document with all sections, see [nature.com/documents/nr-reporting-summary-flat.pdf](https://www.nature.com/documents/nr-reporting-summary-flat.pdf)

## Ecological, evolutionary & environmental sciences study design

All studies must disclose on these points even when the disclosure is negative.

|                          |                                                                                                                                                                                                                                                                                                                |
|--------------------------|----------------------------------------------------------------------------------------------------------------------------------------------------------------------------------------------------------------------------------------------------------------------------------------------------------------|
| Study description        | An assessment of coastal flood risk for all SIDS in view of climate change scenarios                                                                                                                                                                                                                           |
| Research sample          | The framework combines datasets about extreme sea levels, topography, land use, population, socioeconomic data to assess how their interplay will affect future coastal flood losses                                                                                                                           |
| Sampling strategy        | Not relevant                                                                                                                                                                                                                                                                                                   |
| Data collection          | No data collection is involved, all data were previously available                                                                                                                                                                                                                                             |
| Timing and spatial scale | The time frame is from 1980 until 2100 which is enough to express current and future conditions relevant to key climate change policy and research. The temporal resolution is of 6 hours, enough to resolve major storms. The spatial resolution is 30 m, enough to resolve the dynamics of coastal flooding. |
| Data exclusions          | Not available                                                                                                                                                                                                                                                                                                  |
| Reproducibility          | All simulations are deterministic so there are no reproducibility issues.                                                                                                                                                                                                                                      |
| Randomization            | Not relevant                                                                                                                                                                                                                                                                                                   |
| Blinding                 | Not relevant                                                                                                                                                                                                                                                                                                   |

Did the study involve field work?  Yes  No

## Field work, collection and transport

|                        |              |
|------------------------|--------------|
| Field conditions       | Not relevant |
| Location               | Not relevant |
| Access & import/export | Not relevant |
| Disturbance            | Not relevant |

# Reporting for specific materials, systems and methods

We require information from authors about some types of materials, experimental systems and methods used in many studies. Here, indicate whether each material, system or method listed is relevant to your study. If you are not sure if a list item applies to your research, read the appropriate section before selecting a response.

## Materials & experimental systems

- | n/a                                 | Involvement in the study                               |
|-------------------------------------|--------------------------------------------------------|
| <input checked="" type="checkbox"/> | <input type="checkbox"/> Antibodies                    |
| <input checked="" type="checkbox"/> | <input type="checkbox"/> Eukaryotic cell lines         |
| <input checked="" type="checkbox"/> | <input type="checkbox"/> Palaeontology and archaeology |
| <input checked="" type="checkbox"/> | <input type="checkbox"/> Animals and other organisms   |
| <input checked="" type="checkbox"/> | <input type="checkbox"/> Clinical data                 |
| <input checked="" type="checkbox"/> | <input type="checkbox"/> Dual use research of concern  |
| <input checked="" type="checkbox"/> | <input type="checkbox"/> Plants                        |

## Methods

- | n/a                                 | Involvement in the study                        |
|-------------------------------------|-------------------------------------------------|
| <input checked="" type="checkbox"/> | <input type="checkbox"/> ChIP-seq               |
| <input checked="" type="checkbox"/> | <input type="checkbox"/> Flow cytometry         |
| <input checked="" type="checkbox"/> | <input type="checkbox"/> MRI-based neuroimaging |
